# Supplementary material for: Clinician survey on the value of risk prediction for immune-related adverse events induced by immune checkpoint inhibitors
Source: Research Square preprint supplement (doi:10.21203/rs.3.rs-6947226/v1), 2025-07-31
Supplement: Supplementary file 1 [file 7fe24a29ece847aaa0616a9e.docx]

ORIGINAL REPORT

**Clinician survey on the value of risk prediction for immune-related adverse events (irAE) induced by immune checkpoint inhibitors.**

**Table S1: Respondent demographics.** *n = 40*

| **Survey Question** | **Response (%)** |
| --- | --- |
| Question 1. Select your professional role |  |
| Medical specialist | 23 (57.5%) |
| Medical trainee | 7 (17.5%) |
| Nurse specialist | 7 (17.5%) |
| Nurse practitioner | 3 (7.5%) |
| Question 2. In which country do you practice? |  |
| Australia | 37 (92.5%) |
| New Zealand | 3 (7.5%) |
| Question 3. In which of the following settings do you currently work? (Select all that apply) | |
| Metropolitan general hospital, centre or health service | 17 (42.5%) |
| Specialist cancer hospital or centre | 15 (37.5%) |
| Regional general hospital, centre or health service | 10 (25.0%) |
| Private hospital, centre or health service | 4 (10.0%) |
| Academic or research institution | 2 (5.0%) |
| Other: “Telehealth service” | 1 (2.5%) |
| Question 4. In which of the following cancer sub-groups do you currently practice? (Select all that apply) | |
| Melanoma & skin | 26 (65.0 %) |
| Lung | 24 (60.0 %) |
| Breast | 23 (57.5 %) |
| Colorectal | 23 (57.5 %) |
| Upper gastrointestinal | 21 (52.5 %) |
| Urology | 19 (47.5 %) |
| Cancer of unknown primary | 14 (35.0 %) |
| Head & neck | 12 (30.0 %) |
| Neurological | 12 (30.0 %) |
| Gynaecological | 11 (27.5 %) |
| Sarcoma | 7 (17.5 %) |
| Haematology | 4 (10.0 %) |
| Question 5. Approximately how many patients under your care commence checkpoint inhibitor immunotherapy each month? This includes monotherapy, combination therapy or in combination with chemotherapy, radiotherapy or other cancer treatment. | |
| Up to 5 patients per month | 24 (60.0 %) |
| Between 5-10 patients per month | 12 (30.0 %) |
| Over 10 patients per month | 2 (5.0 %) |
| None | 2 (5.0 %) |

*All percentages expressed with denominator of total number of survey responses.*

**Table S2: Responses on current practice prior to commencing treatment.** *n = 40*

| **Survey Question** | **Response (%)** |
| --- | --- |
| Question 6. Which of the following factors do you consider when assessing likelihood of immune-related adverse events prior to commencing checkpoint inhibitor immunotherapy? (Select all that apply) | |
| Pre-existing autoimmune disease | 37 (92.5 %) |
| Previous use of immune checkpoint inhibitor therapy | 31 (77.5 %) |
| Baseline routine laboratory results, including organ function | 26 (65.0 %) |
| Other co-morbidities | 25 (62.5 %) |
| Patient/carer ability to identify and report irAE | 25 (62.5 %) |
| ECOG performance score | 22 (55.0 %) |
| Concomitant medications | 17 (42.5 %) |
| Previous radiation therapy | 15 (37.5 %) |
| History of anaphylaxis or severe allergies | 9 (22.5 %) |
| Gender | 6 (15.0 %) |
| History of medication-related adverse effects | 5 (12.5 %) |
| Investigations outside routine guidelines | 4 (10.0 %) |
| Other:  “High PDL1 in lung cancer seems to have more IO toxicity anecdotally”  “Planned regimen (i.e. single agent or combination ICI; combination with chemotherapy); primary tumour type (e.g. increased risk of pneumonitis in lung cancer patients)”  “Social circumstances more in relation to how the patient may deal with/report/be able to manage toxicities rather than likelihood of developing them” | 3 (7.5 %) |
| Question 7. In your current practice, do you use a scoring system or standard method beyond general risk profiling to assess risk of immune-related adverse events for individual patients prior to commencing checkpoint inhibitor immunotherapy? | |
| No | 40 (100.0 %) |
| Yes | 0 (0.0 %) |
| Question 8. Do you believe it would be useful to identify patients at risk of immune-related adverse events prior to commencing checkpoint inhibitor immunotherapy? | |
| Extremely useful | 15 (37.5 %) |
| Very useful | 14 (35.0 %) |
| Somewhat useful | 8 (20.0 %) |
| Slightly useful | 3 (7.5 %) |
| Not at all useful | 0 (0.0 %) |
| Question 9. How often in your current practice do you assess risk of immune-related adverse events prior to commencing checkpoint inhibitor immunotherapy? | |
| Always | 22 (55.0 %) |
| Most of the time | 13 (35.0 %) |
| Sometimes | 1 (2.5 %) |
| Infrequently | 1 (2.5 %) |
| Never | 3 (7.5 %) |
| Question 10. In your current practice, do you discuss risk of immune-related adverse events with patients prior to commencing checkpoint inhibitor immunotherapy? | |
| Always | 37 (92.5 %) |
| Most of the time | 2 (5.0 %) |
| Sometimes | 1 (2.5 %) |
| Infrequently | 0 (0.0 %) |
| Never | 0 (0.0 %) |

*All percentages expressed with denominator of total number of survey responses.*

**Table S3: Responses to potential risk prediction model.** *n = 40*

| **Survey Question** | **Response (%)** | |
| --- | --- | --- |
| Question 11. Assuming an irAE risk prediction tool is developed and validated for the cancer setting, how likely are you to use it in your current practice? | | |
| Certainly | | 11 (27.5 %) |
| Likely | | 22 (55.0 %) |
| Possibly | | 7 (17.5 %) |
| Unlikely | | 0 (0.0 %) |
| Not at all | | 0 (0.0 %) |
| Question 12. How likely are you to use irAE risk prediction in treatment discussions with individual patients? | | |
| Certainly | | 12 (30.0 %) |
| Likely | | 24 (60.0 %) |
| Possibly | | 4 (10.0 %) |
| Unlikely | | 0 (0.0 %) |
| Not at all | | 0 (0.0 %) |
| Question 13. How likely are you to use irAE risk prediction in treatment decision-making? | | |
| Certainly | | 9 (22.5 %) |
| Likely | | 19 (47.5 %) |
| Possibly | | 12 (30.0 %) |
| Unlikely | | 0 (0.0 %) |
| Not at all | | 0 (0.0 %) |
| Question 14. If required to inform irAE risk prediction, how likely are you to perform simple additional baseline assessment(s) for an individual patient prior to commencing checkpoint inhibitor immunotherapy? For example, standard laboratory testing. | | |
| Certainly | | 19 (47.5 %) |
| Likely | | 19 (47.5 %) |
| Possibly | | 1 (2.5 %) |
| Unlikely | | 1 (2.5 %) |
| Not at all | | 0 (0.0 %) |
| Question 15. If required to inform irAE risk prediction, how likely are you to perform complex additional baseline assessment(s) for an individual patient prior to initiating checkpoint inhibitor immunotherapy? For example, genomic testing. | | |
| Certainly | | 3 (7.5 %) |
| Likely | | 7 (17.5 %) |
| Possibly | | 17 (42.5 %) |
| Unlikely | | 13 (32.5 %) |
| Not at all | | 0 (0.0 %) |
| Question 16. What do you think are potential barriers to integrating irAE risk prediction into clinical practice? Please indicate from the list below. | | |
| Cost implications or reimbursement of additional test/s | | 30 (75.0 %) |
| Timing of additional assessment/s prior to treatment | | 30 (75.0 %) |
| Unknown accuracy and specificity | | 30 (75.0 %) |
| Complexity of baseline assessment/s | | 26 (65.0 %) |
| Additional work for clinicians | | 18 (45.0 %) |
| Patient access to baseline assessment/s | | 17 (42.5 %) |
| Integration into existing systems or workflows | | 16 (40.0 %) |
| Ease of reporting additional assessment/s prior to treatment | | 11 (27.5 %) |
| Difficult to discuss baseline risk of adverse events with patients | | 7 (17.5 %) |
| Unlikely to inform treatment discussions or decision-making | | 6 (15.0 %) |
| Other:  “If tool took weeks to come back and delayed initiating treatment risk prediction would not be helpful” | | 1 (2.5 %) |
| Question 17. Which of the following management strategies would you consider if an irAE risk prediction tool were to indicate that an individual patient has a higher risk of immune-related adverse events? (Select all that apply) | | |
| Inform tailored patient instructions and education | | 32 (80.0 %) |
| Increased follow up | | 30 (75.0 %) |
| Earlier clinic review | | 28 (70.0 %) |
| Avoid combination immunotherapy | | 24 (60.0 %) |
| Increased supportive care | | 24 (60.0 %) |
| Additional clinical or laboratory assessment/s | | 15 (37.5 %) |
| Employ strategies to reduce risk e.g. immunomodulatory agents | | 9 (22.5 %) |
| Other (please specify) | | 5 (12.5 %) |
| Change in treatment interval | | 4 (10.0 %) |
| No change to current practice | | 2 (5.0 %) |
| Other:  “Consider avoiding immunotherapy if modest benefit but high risk”  “May also help some patients with borderline indications for ICI (e.g. neoadjuvant breast cancer patients with node-negative tumours) decide whether to include ICI in their treatment regimen - a patient a high risk of irAE who already has a good chance of pCR [pathological complete response] with chemo alone may elect to omit ICI.”  “Advise treating Doctors/Oncologists as they would be the ones potentially modifying the treatment plan.”  “Education is key. Needs to be provided in different ways to meet different learning needs.”  “Consider availability of non-immunotherapy treatment options, and if in metastatic setting other options available defer use of immunotherapy till a later-line on discussion case-by-case with individual patients” | | 5 (12.5 %) |
| Question 18. Which risk score format would you find most useful when considering immune-related adverse events? | | |
| Percentage range e.g. 5-10%, 10-20% | | 15 (37.5 %) |
| Category e.g. low, medium, high | | 9 (22.5 %) |
| I don't have a preference | | 8 (20.0 %) |
| Discrete percentage e.g. 25% chance of irAE | | 3 (7.5 %) |
| Grading e.g. 1 (for lowest) to 5 (for highest) | | 3 (7.5 %) |
| Other:  “I think quantification is problematic as may over-emphasise minor irAE (e.g. hypothyroidism)”  “Grading 1 to 5 in line with CTCAE [Common Terminology Criteria for Adverse Events]” | | 2 (5.0 %) |

*All percentages expressed with denominator of total number of survey responses.*

**Table S4: Responses from scenario 1.** *n = 38*

| **Scenario 1** | **Response (%)** |
| --- | --- |
| Patient A is a 30-year-old newly diagnosed with BRAF mutant disease with evidence of brain metastases. Patient A has no previous medical history. Would you consider checkpoint inhibitor immunotherapy for this patient? | |
| Yes – I would consider combined checkpoint inhibitor immunotherapy | 34 (89.5 %) |
| Yes – I would consider single agent checkpoint inhibitor immunotherapy | 3 (7.9 %) |
| No – I would not consider any checkpoint inhibitor immunotherapy | 0 (0.0 %) |
| No – I would avoid checkpoint inhibitor immunotherapy | 1 (2.6 %) |
| The risk prediction model indicates that Patient A has a high risk of immunotherapy-induced colitis. Would you consider checkpoint inhibitor immunotherapy for this patient? | |
| Yes – I would consider combined checkpoint inhibitor immunotherapy | 25 (65.8 %) |
| Yes – I would consider single agent checkpoint inhibitor immunotherapy | 7 (18.4 %) |
| No – I would not consider any checkpoint inhibitor immunotherapy | 2 (5.3 %) |
| No – I would avoid checkpoint inhibitor immunotherapy | 4 (10.5 %) |
| The risk prediction model indicates that Patient A has a very high risk of any irAE. Would you consider checkpoint inhibitor immunotherapy for this patient? | |
| Yes – I would consider combined checkpoint inhibitor immunotherapy | 20 (52.6 %) |
| Yes – I would consider single agent checkpoint inhibitor immunotherapy | 9 (23.7 %) |
| No – I would not consider any checkpoint inhibitor immunotherapy | 3 (7.9 %) |
| No – I would avoid checkpoint inhibitor immunotherapy | 6 (15.8 %) |

**Table S5: Responses from scenario 2.** *n = 38*

| **Scenario 2** | **Response (%)** |
| --- | --- |
| Patient B is a 65-year-old newly diagnosed with BRAF wildtype disease. Patient B has well-controlled rheumatoid arthritis. Would you consider checkpoint inhibitor immunotherapy for this patient? | |
| Yes – I would consider combined checkpoint inhibitor immunotherapy | 14 (36.9 %) |
| Yes – I would consider single agent checkpoint inhibitor immunotherapy | 23 (60.5 %) |
| No – I would not consider any checkpoint inhibitor immunotherapy | 1 (2.6 %) |
| No – I would avoid checkpoint inhibitor immunotherapy | 0 (0.0 %) |
| The risk prediction model indicates that Patient B has a moderate risk of immunotherapy-induced colitis. Would you consider checkpoint inhibitor immunotherapy for this patient? | |
| Yes – I would consider combined checkpoint inhibitor immunotherapy | 12 (31.6 %) |
| Yes – I would consider single agent checkpoint inhibitor immunotherapy | 23 (60.5 %) |
| No – I would not consider any checkpoint inhibitor immunotherapy | 3 (7.9 %) |
| No – I would avoid checkpoint inhibitor immunotherapy | 0 (0.0 %) |
| The risk prediction model indicates that Patient B has a high risk of any irAE. Would you consider checkpoint inhibitor immunotherapy for this patient? | |
| Yes – I would consider combined checkpoint inhibitor immunotherapy | 7 (18.4 %) |
| Yes – I would consider single agent checkpoint inhibitor immunotherapy | 23 (60.5 %) |
| No – I would not consider any checkpoint inhibitor immunotherapy | 4 (10.5 %) |
| No – I would avoid checkpoint inhibitor immunotherapy | 4 (10.5 %) |

**Table S6: Responses from scenario 3.** *n = 38*

| **Scenario 3** | **Response (%)** |
| --- | --- |
| Patient C is an 80-year-old with newly diagnosed cancer. Patient C has experienced previous toxicity to medicines and has an ECOG performance status of 1. Would you consider checkpoint inhibitor immunotherapy for this patient? | |
| Yes – I would consider combined checkpoint inhibitor immunotherapy | 7 (18.4 %) |
| Yes – I would consider single agent checkpoint inhibitor immunotherapy | 27 (71.1 %) |
| No – I would not consider any checkpoint inhibitor immunotherapy | 3 (7.9 %) |
| No – I would avoid checkpoint inhibitor immunotherapy | 1 (2.6 %) |
| The risk prediction model indicates that Patient C has a low risk of immunotherapy-induced colitis. Would you consider checkpoint inhibitor immunotherapy for this patient? | |
| Yes – I would consider combined checkpoint inhibitor immunotherapy | 6 (15.8 %) |
| Yes – I would consider single agent checkpoint inhibitor immunotherapy | 30 (78.9 %) |
| No – I would not consider any checkpoint inhibitor immunotherapy | 1 (2.6 %) |
| No – I would avoid checkpoint inhibitor immunotherapy | 1 (2.6 %) |
| The risk prediction model indicates that Patient C has a moderate risk of any irAE. Would you consider checkpoint inhibitor immunotherapy for this patient? | |
| Yes – I would consider combined checkpoint inhibitor immunotherapy | 3 (7.9 %) |
| Yes – I would consider single agent checkpoint inhibitor immunotherapy | 27 (71.1 %) |
| No – I would not consider any checkpoint inhibitor immunotherapy | 4 (10.5 %) |
| No – I would avoid checkpoint inhibitor immunotherapy | 4 (10.5 %) |
